# Supplementary material
Source: PubMed Central journal article supplement (PMC3725292)

**a** Promoter optimization

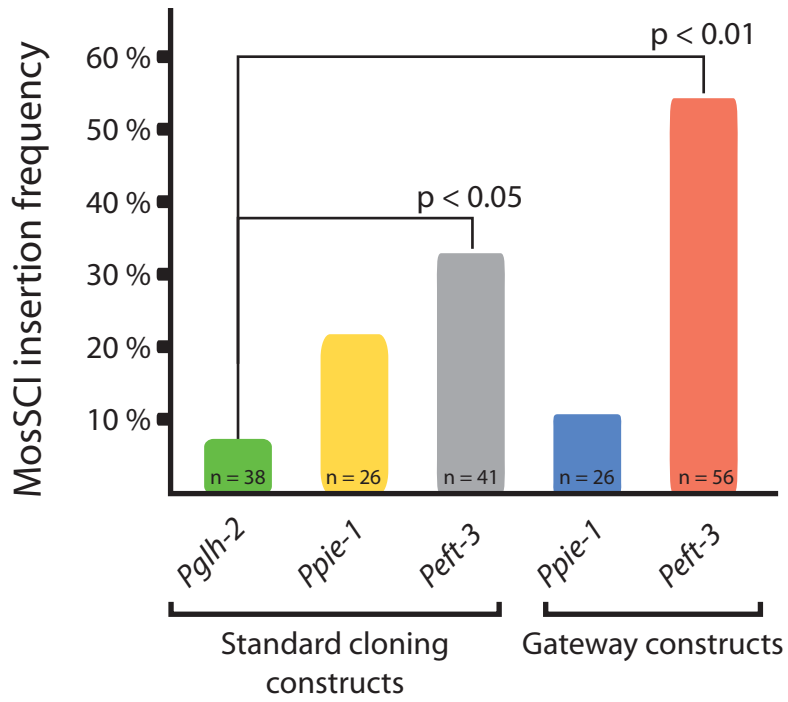

**b** Hyperactive transposase variants

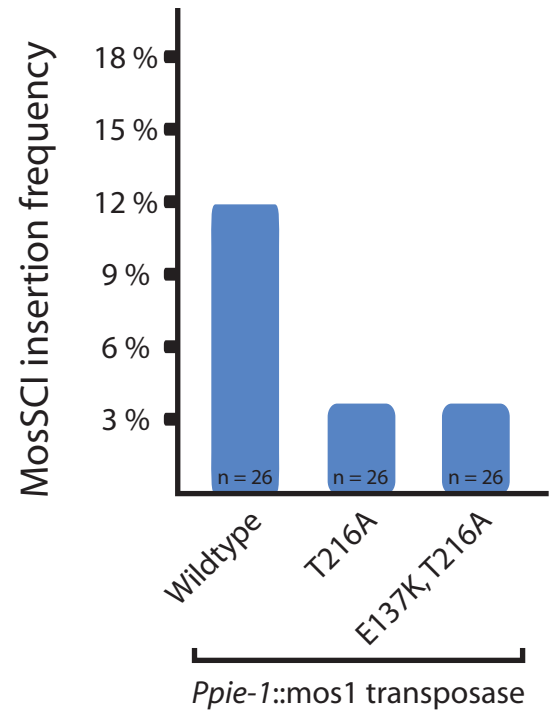

**a** Effect of *peel-1* on insertion frequency.

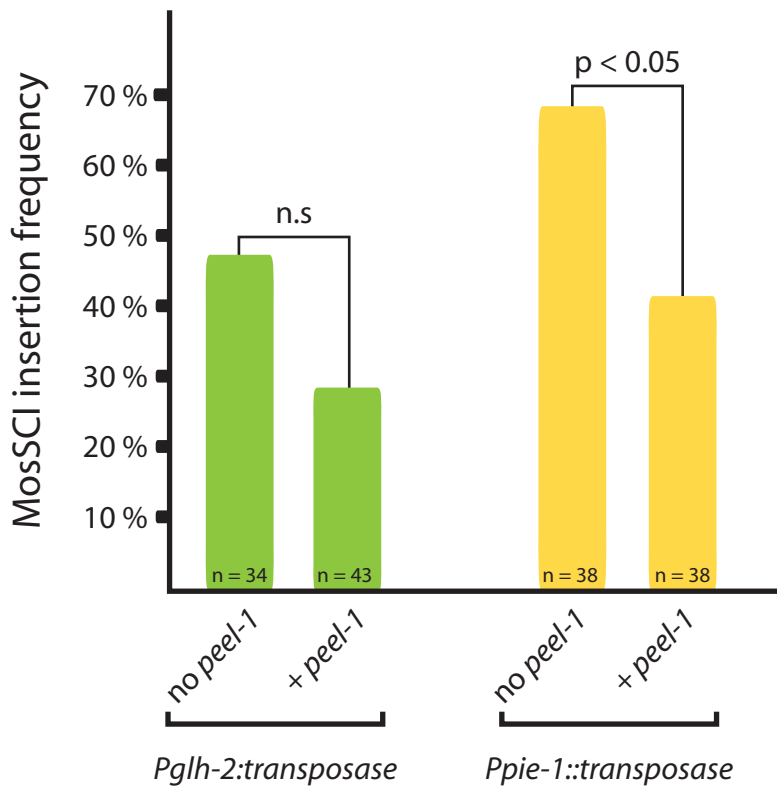

**b** *peel-1* induced toxicity.

Before heat shock

6 hours after heat shock

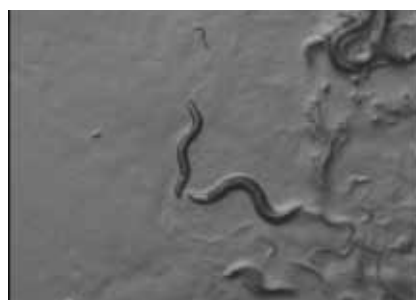

2 hours  
@ 34°C  
→

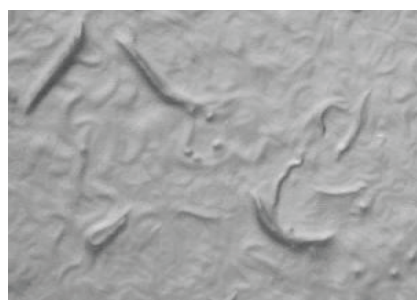

**a** Consistent expression

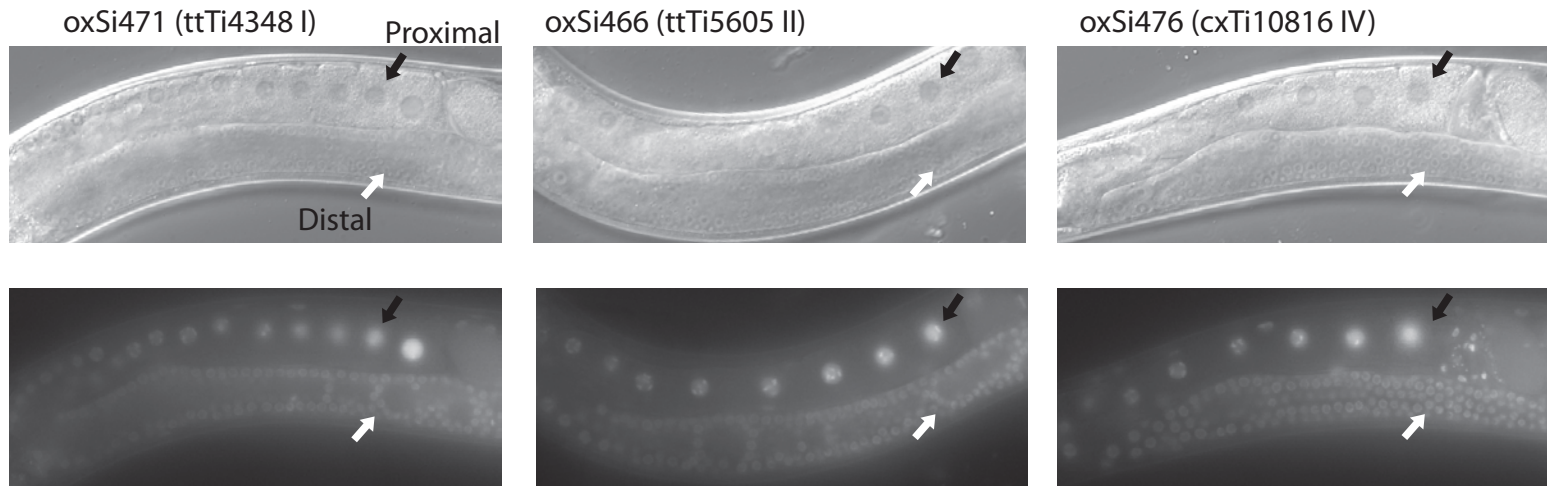

**b** Restricted expression

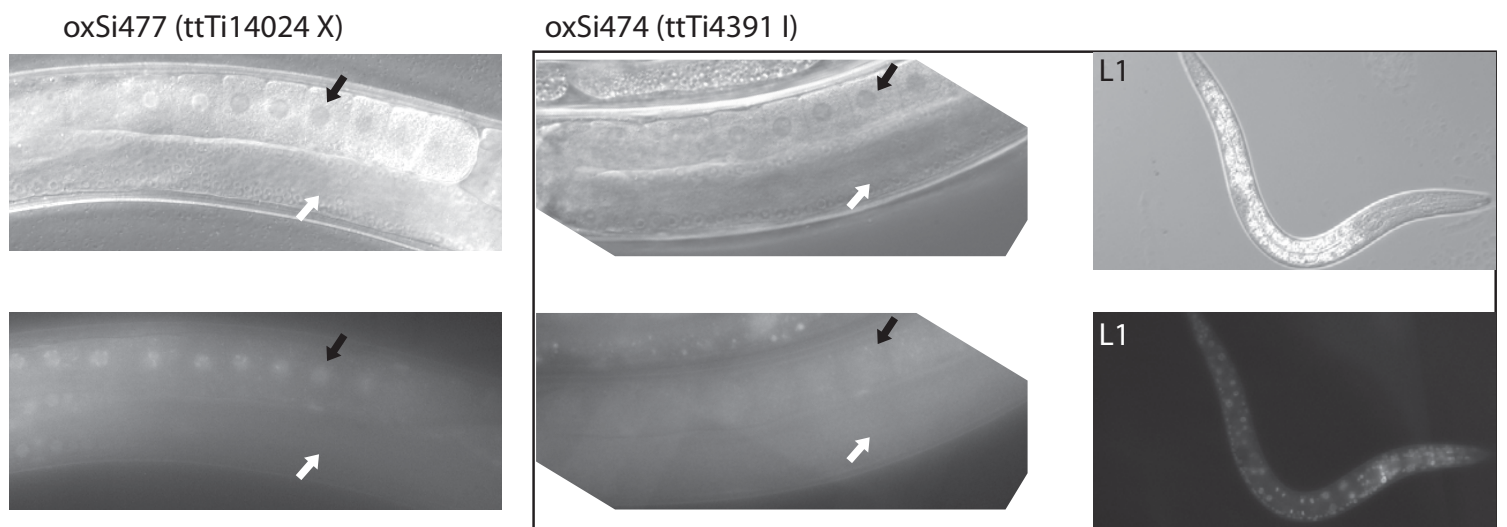

**c** Variable expression

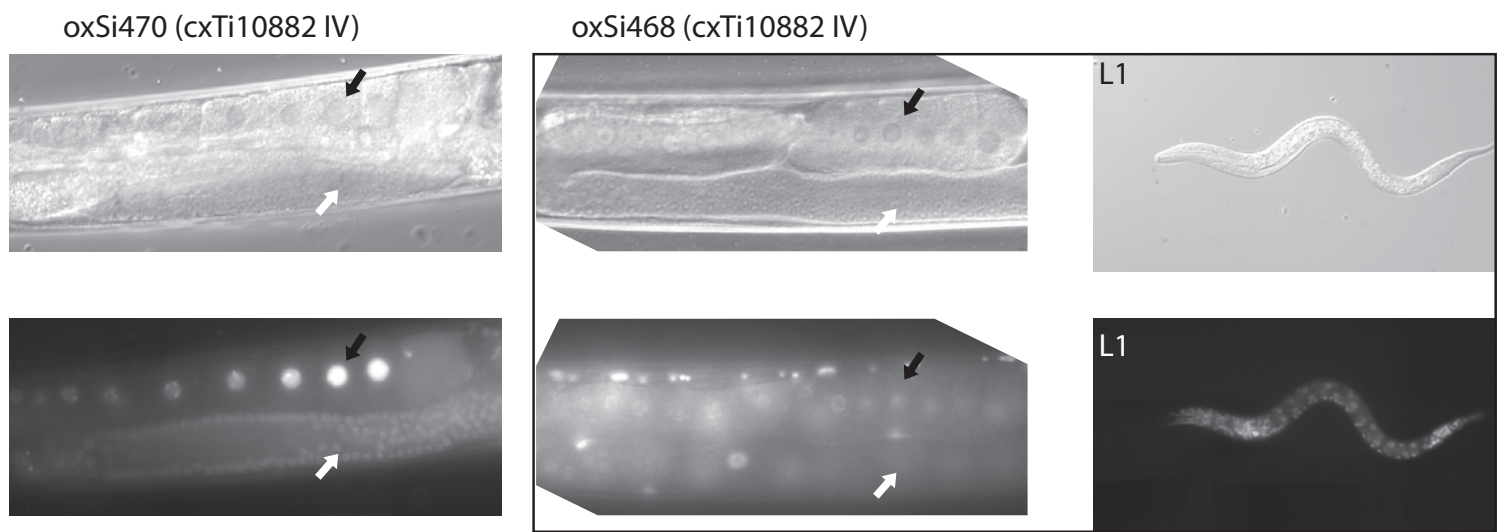

**a**

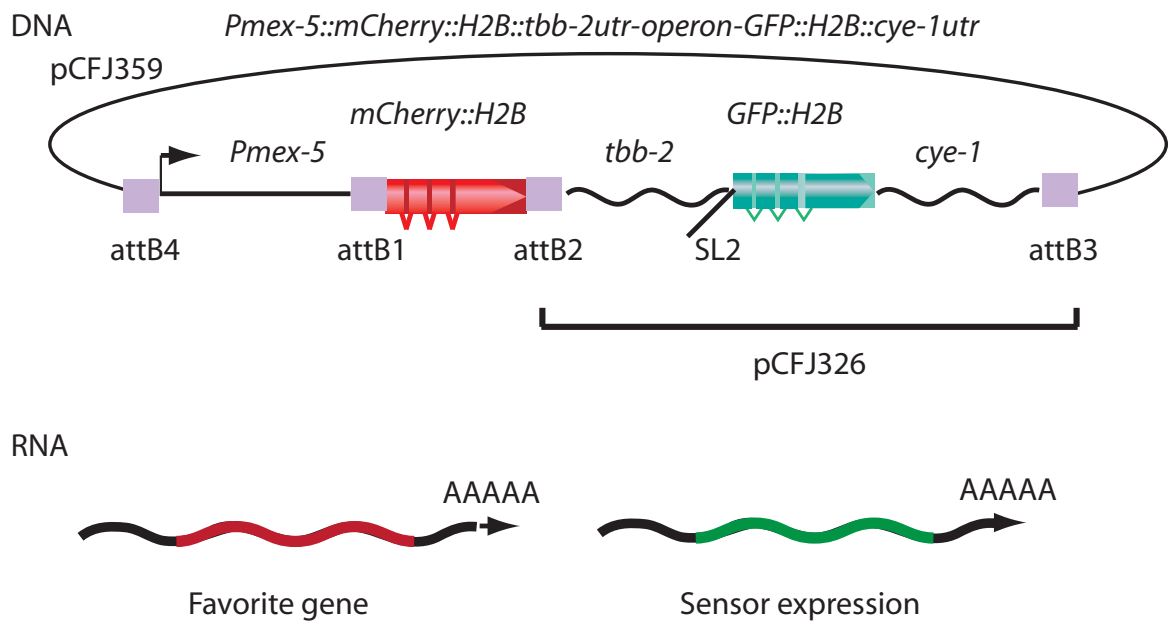

**b**

*oxSi487 (ttTi5605 II)*

hermaphrodite

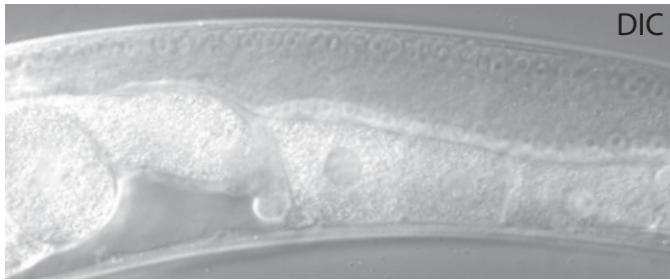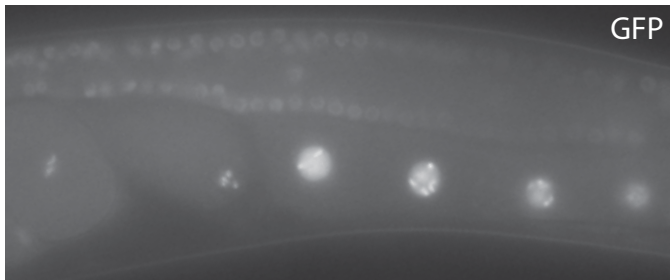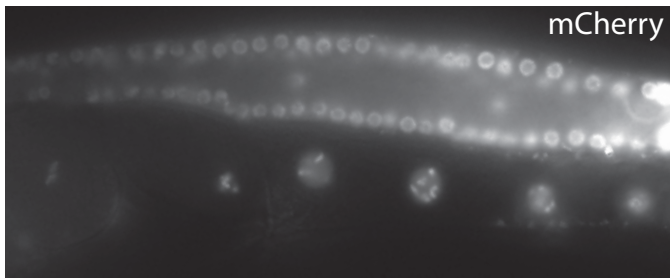

male

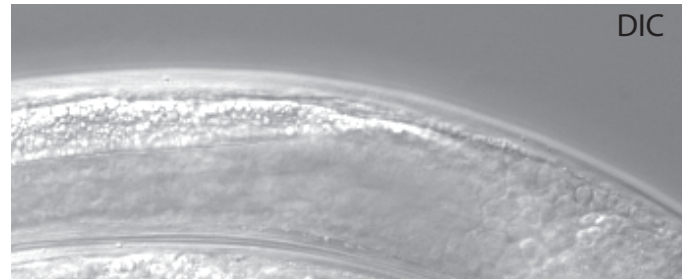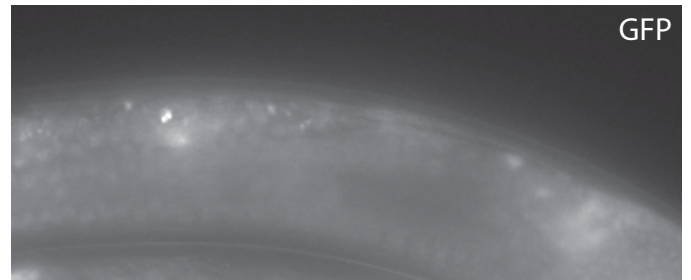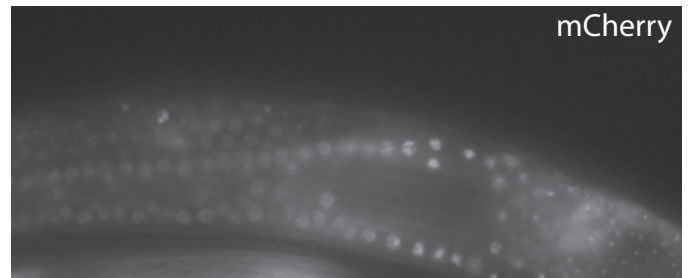

Genetic position

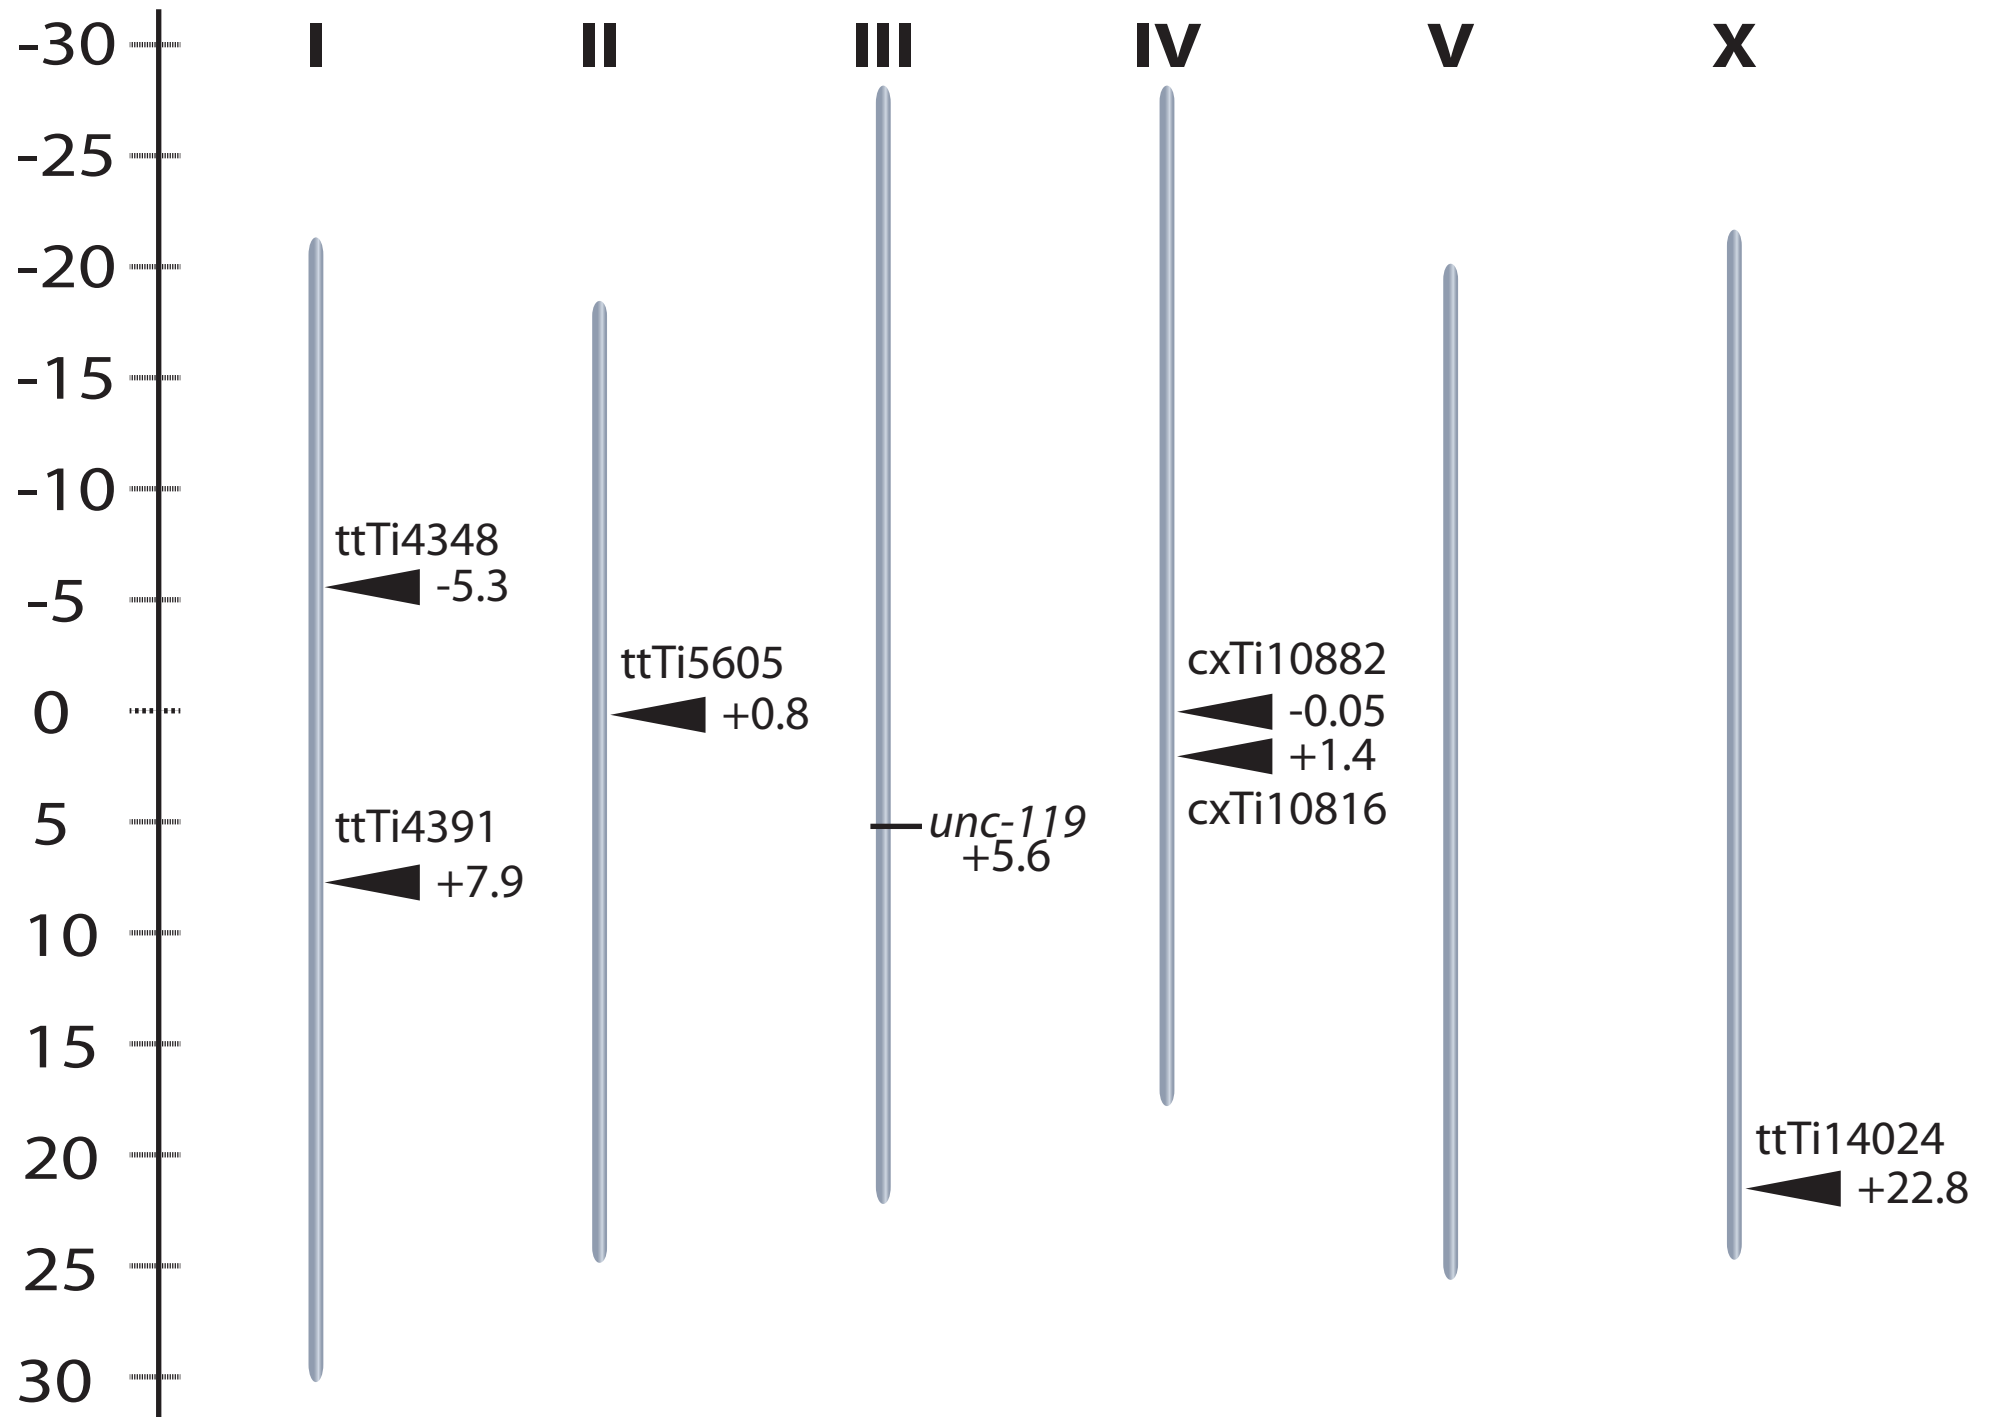

Supplement: NIHMS486650-supplement-01.pdf [file NIHMS486650-supplement-01.pdf]
